# Supplementary material for: Rotational Tillage Practices to Deal with Soil Compaction in Carbon Farming
Source: MDPI journal article supplement (doi:10.3390/soilsystems7040090), 2023-10-18
Supplement: s1 [file s1]

## Supplementary material

**Table S1.** Results from the statistical analysis for the 1997 penetration resistance measurements.

| Depth                                                                      | Soil penetration resistance (KPa) - 1997 |         |        |        |        |        |        |        |
|----------------------------------------------------------------------------|------------------------------------------|---------|--------|--------|--------|--------|--------|--------|
|                                                                            | 0.05 m                                   | 0.10 m  | 0.15 m | 0.20 m | 0.25 m | 0.30 m | 0.35 m | 0.40 m |
| <i>F statistic</i>                                                         |                                          |         |        |        |        |        |        |        |
| Field                                                                      | 0.283                                    | 0.852   | 2.268  | 0.420  | 0.658  | 0.631  | 1.241  | 0.122  |
| Tillage                                                                    | 3.286                                    | 3.341   | 3.676  | 1.543  | 1.391  | 0.377  | 0.235  | 0.166  |
| Field X Tillage                                                            | 0.920                                    | 0.993   | 0.988  | 0.964  | 0.996  | 0.995  | 0.975  | 0.978  |
| <i>p. value</i>                                                            |                                          |         |        |        |        |        |        |        |
| Field                                                                      | 0.599                                    | 0.363   | 0.143  | 0.522  | 0.739  | 0.433  | 0.274  | 0.729  |
| Tillage                                                                    | 0.024                                    | 0.022   | 0.015  | 0.215  | 0.261  | 0.823  | 0.916  | 0.954  |
| Field X Tillage                                                            | 0.920                                    | 0.993   | 0.988  | 0.964  | 0.996  | 0.995  | 0.975  | 0.978  |
| <i>Means (Field, main effects)</i>                                         |                                          |         |        |        |        |        |        |        |
| Field 1                                                                    | 1243                                     | 1935    | 2079   | 2006   | 2121   | 2331   | 2585   | 2648   |
| Field 2                                                                    | 1330                                     | 1740    | 1792   | 1863   | 2031   | 2158   | 2364   | 2578   |
| <i>Means (Tillage, main effects) - Homogeneous subsets*</i>                |                                          |         |        |        |        |        |        |        |
| Tillage - MP                                                               | 941a                                     | 1277a   | 1335a  | 1438   | 1595   | 1996   | 2475   | 2580   |
| Tillage - CP                                                               | 1121ab                                   | 1498ab  | 1718ab | 1868   | 2071   | 2260   | 2376   | 2557   |
| Tillage - PH                                                               | 1204ab                                   | 2295 bc | 2367 b | 2212   | 2262   | 2382   | 2650   | 2740   |
| Tillage - DH                                                               | 1346ab                                   | 2124abc | 2125ab | 2114   | 2312   | 2341   | 2472   | 2669   |
| Tillage - NT                                                               | 1818 b                                   | 1991ab  | 2132ab | 2039   | 2138   | 2243   | 2398   | 2515   |
| <i>Means (Field X Tillage, interaction effects) - Homogeneous subsets*</i> |                                          |         |        |        |        |        |        |        |
| Field 1 - MP                                                               | 962a                                     | 1414a   | 1466a  | 1544   | 1686   | 2057   | 2484   | 2574   |
| Field 1 - CP                                                               | 949a                                     | 1500a   | 1830ab | 2036   | 2141   | 2348   | 2525   | 2540   |
| Field 1 - PH                                                               | 1166ab                                   | 2422 b  | 2590 b | 2259   | 2296   | 2523   | 2865   | 2902   |
| Field 1 - DH                                                               | 1267ab                                   | 2259 b  | 2307ab | 2225   | 2381   | 2472   | 2567   | 2710   |
| Field 1 - NT                                                               | 1868 b                                   | 2075ab  | 2201ab | 1961   | 2096   | 2254   | 2483   | 2510   |
| Field 2 - MP                                                               | 920a                                     | 1140a   | 1204a  | 1332   | 1505   | 1934   | 2465   | 2586   |
| Field 2 - CP                                                               | 1293a                                    | 1496ab  | 1605ab | 1699   | 2000   | 2172   | 2227   | 2574   |
| Field 2 - PH                                                               | 1242ab                                   | 2167 b  | 2144 b | 2164   | 2227   | 2241   | 2436   | 2578   |
| Field 2 - DH                                                               | 1425ab                                   | 1988 b  | 1942ab | 2004   | 2244   | 2209   | 2377   | 2628   |
| Field 2 - NT                                                               | 1768 b                                   | 1906ab  | 2063ab | 2116   | 2179   | 2232   | 2312   | 2519   |

\*Based on Tuckey test

**Table S2.** Results from the statistical analysis for the 1999 penetration resistance measurements.

| Depth           | Soil penetration resistance (KPa) - 1999                                   |         |        |         |         |         |        |        |
|-----------------|----------------------------------------------------------------------------|---------|--------|---------|---------|---------|--------|--------|
|                 | 0.05 m                                                                     | 0.10 m  | 0.15 m | 0.20 m  | 0.25 m  | 0.30 m  | 0.35 m | 0.40 m |
|                 | <i>F statistic</i>                                                         |         |        |         |         |         |        |        |
| Field           | 0.738                                                                      | 0.071   | 3.902  | 2.914   | 4.721   | 6.665   | 10.594 | 15.835 |
| Tillage         | 12.335                                                                     | 15.230  | 30.896 | 21.677  | 17.966  | 12.418  | 9.490  | 1.437  |
| Field X Tillage | 0.266                                                                      | 0.825   | 0.265  | 0.498   | 0.389   | 0.565   | 0.083  | 0.156  |
|                 | <i>p-value</i>                                                             |         |        |         |         |         |        |        |
| Field           | 0.397                                                                      | 0.792   | 0.057  | 0.098   | 0.038   | 0.015   | 0.003  | 0.000  |
| Tillage         | 0.000                                                                      | 0.000   | 0.000  | 0.000   | 0.000   | 0.000   | 0.000  | 0.246  |
| Field X Tillage | 0.266                                                                      | 0.825   | 0.265  | 0.498   | 0.389   | 0.565   | 0.083  | 0.156  |
|                 | <i>Means (Field, main effects)</i>                                         |         |        |         |         |         |        |        |
| Field 1         | 692                                                                        | 1241    | 1493   | 1579    | 1678    | 1844    | 2023   | 2144   |
| Field 2         | 724                                                                        | 1253    | 1561   | 1643    | 1764    | 1957    | 2176   | 2297   |
|                 | <i>Means (Tillage, main effects) - Homogeneous subsets*</i>                |         |        |         |         |         |        |        |
| Tillage - MP    | 592a                                                                       | 1030a   | 1264a  | 1334a   | 1449a   | 1663a   | 1906a  | 2171   |
| Tillage - CP    | 554a                                                                       | 1011a   | 1318a  | 1468a   | 1601a   | 1774a   | 1938a  | 2149   |
| Tillage - PH    | 807 bc                                                                     | 1389 bc | 1678 b | 1740 b  | 1830 b  | 2043 b  | 2216 b | 2328   |
| Tillage - DH    | 688ab                                                                      | 1365 b  | 1685 b | 1769 b  | 1846 b  | 1988 b  | 2240 b | 2283   |
| Tillage - NT    | 898 c                                                                      | 1438 bc | 1687 b | 1741 b  | 1875 b  | 2033 b  | 2195 b | 2198   |
|                 | <i>Means (Field X Tillage, interaction effects) - Homogeneous subsets*</i> |         |        |         |         |         |        |        |
| Field 1 - MP    | 495a                                                                       | 967a    | 1166a  | 1264a   | 1361a   | 1541a   | 1722a  | 1942   |
| Field 1 - CP    | 555ab                                                                      | 1023a   | 1340a  | 1474ab  | 1552ab  | 1716ab  | 1800a  | 1973   |
| Field 1 - PH    | 796 bc                                                                     | 1399 b  | 1636 b | 1679 bc | 1756 bc | 1984 bc | 2182 b | 2297   |
| Field 1 - DH    | 684abc                                                                     | 1379 b  | 1679 b | 1783 c  | 1817 c  | 1952 bc | 2239 b | 2213   |
| Field 1 - NT    | 930 c                                                                      | 1434 b  | 1641 b | 1692 bc | 1903 c  | 2027 c  | 2170 b | 2138   |
| Field 2 - MP    | 689ab                                                                      | 1094ab  | 1363a  | 1405a   | 1538a   | 1785    | 2090   | 2401   |
| Field 2 - CP    | 553a                                                                       | 999a    | 1295a  | 1462a   | 1650ab  | 1831    | 2077   | 2325   |
| Field 2 - PH    | 819 b                                                                      | 1379 bc | 1720 b | 1802 b  | 1905 b  | 2102    | 2251   | 2359   |
| Field 2 - DH    | 691ab                                                                      | 1352 bc | 1692 b | 1755 b  | 1875 b  | 2025    | 2241   | 2353   |
| Field 2 - NT    | 866 b                                                                      | 1443 c  | 1734 b | 1791 b  | 1847 b  | 2040    | 2221   | 2257   |

\*Based on Tukey test

**Table S3.** Results from the statistical analysis for the 2001 penetration resistance measurements (Tillage A = last tillage, Tillage B = previous tillage).

| Depth                                                                                                  | Soil penetration resistance (KPa) - 2001 |          |           |             |             |             |                |           |
|--------------------------------------------------------------------------------------------------------|------------------------------------------|----------|-----------|-------------|-------------|-------------|----------------|-----------|
|                                                                                                        | 0.05 m                                   | 0.10 m   | 0.15 m    | 0.20 m      | 0.25 m      | 0.30 m      | 0.35 m         | 0.40 m    |
| <i>F statistic</i>                                                                                     |                                          |          |           |             |             |             |                |           |
| Field                                                                                                  | 62.607                                   | 48.298   | 107.888   | 152.834     | 195.971     | 160.693     | 70.893         | 20.716    |
| Tillage A                                                                                              | 26.262                                   | 73.245   | 107.467   | 120.298     | 127.310     | 154.814     | 94.958         | 77.680    |
| Field x Tillage A                                                                                      | 1.971                                    | 2.273    | 2.425     | 1.320       | 1.862       | 0.907       | 2.562          | 1.224     |
| Tillage B                                                                                              | 7.190                                    | 20.433   | 26.411    | 34.132      | 42.924      | 52.513      | 25.313         | 7.525     |
| Field x Tillage B                                                                                      | 0.976                                    | 1.608    | 1.716     | 0.994       | 1.009       | 1.735       | 1.569          | 0.579     |
| Tillage A x Tillage B                                                                                  | 4.030                                    | 6.638    | 6.728     | 4.853       | 3.958       | 4.913       | 2.379          | 1.870     |
| <i>p-value</i>                                                                                         |                                          |          |           |             |             |             |                |           |
| Field                                                                                                  | 0.000                                    | 0.000    | 0.000     | 0.000       | 0.000       | 0.000       | 0.000          | 0.000     |
| Tillage A                                                                                              | 0.000                                    | 0.000    | 0.000     | 0.000       | 0.000       | 0.000       | 0.000          | 0.000     |
| Field x Tillage A                                                                                      | 0.007                                    | 0.001    | 0.001     | 0.156       | 0.012       | 0.603       | 0.000          | 0.227     |
| Tillage B                                                                                              | 0.000                                    | 0.000    | 0.000     | 0.000       | 0.000       | 0.000       | 0.000          | 0.000     |
| Field x Tillage B                                                                                      | 0.509                                    | 0.043    | 0.025     | 0.484       | 0.464       | 0.023       | 0.052          | 0.951     |
| Tillage A x Tillage B                                                                                  | 0.000                                    | 0.000    | 0.000     | 0.000       | 0.000       | 0.000       | 0.004          | 0.031     |
| <i>Means (Field, main effects)</i>                                                                     |                                          |          |           |             |             |             |                |           |
| Field 1                                                                                                | 841                                      | 1695     | 1846      | 1949        | 2027        | 2215        | 2481           | 2890      |
| Field 2                                                                                                | 1081                                     | 1999     | 2278      | 2445        | 2577        | 2677        | 2857           | 3120      |
| <i>Means (Tillage, main effects) - Homogeneous subsets*</i>                                            |                                          |          |           |             |             |             |                |           |
| Tillage A - MP                                                                                         | 692a                                     | 1342a    | 1465a     | 1502a       | 1557a       | 1651a       | 1863a          | 2154a     |
| Tillage A - CP                                                                                         | 1040 bc                                  | 1650 b   | 1775 b    | 1919 b      | 2091 b      | 2263 b      | 2576 b         | 2988 b    |
| Tillage A - PH                                                                                         | 952 b                                    | 1679 b   | 1964 c    | 2272 c      | 2389 c      | 2604 c      | 2854 c         | 3281 c    |
| Tillage A - DH                                                                                         | 954 b                                    | 2233 c   | 2579 d    | 2670 d      | 2739 d      | 2818 d      | 2995 cd        | 3204 bc   |
| Tillage A - NT                                                                                         | 1165 c                                   | 2327 c   | 2524 d    | 2621 d      | 2732 d      | 2892 d      | 3055 d         | 3394 c    |
| Tillage B - MP                                                                                         | 880ab                                    | 1601a    | 1746a     | 1815a       | 1746a       | 1951a       | 2238a          | 2749a     |
| Tillage B - CP                                                                                         | 853a                                     | 1615a    | 1868a     | 2034 b      | 1868a       | 2399 b      | 2660 b         | 3000 b    |
| Tillage B - PH                                                                                         | 1015 c                                   | 2001 b   | 2229 b    | 2389 c      | 2229 b      | 2633 c      | 2808 bc        | 3140 b    |
| Tillage B - DH                                                                                         | 987 bc                                   | 1950 b   | 2177 b    | 2330 c      | 2177 b      | 2667 c      | 2857 c         | 3116 b    |
| Tillage B - NT                                                                                         | 1068 c                                   | 2064 b   | 2285 b    | 2415 c      | 2285 b      | 2578 c      | 2778 bc        | 3015 b    |
| <i>Means (Field X Tillage, interaction effects) - Homogeneous subsets*</i>                             |                                          |          |           |             |             |             |                |           |
| Field 1 x Tillage A - MP                                                                               | 572a                                     | 1,190a   | 1,249a    | 1,254a      | 1,282a      | 1,420a      | 1,675a         | 2,039a    |
| Field 1 x Tillage A - CP                                                                               | 920 bc                                   | 1,498ab  | 1,559ab   | 1,671ab     | 1,816 b     | 2,032 bc    | 2,388 bc       | 2,873 b   |
| Field 1 x Tillage A - PH                                                                               | 832ab                                    | 1,527ab  | 1,748 bc  | 2,024 bcd   | 2,114 bc    | 2,373 cd    | 2,665 cd       | 3,165 bcd |
| Field 1 x Tillage A - DH                                                                               | 834ab                                    | 2,081 cd | 2,363 def | 2,422 de    | 2,464 cd    | 2,587 de    | 2,807 cdef     | 3,088 bc  |
| Field 1 x Tillage A - NT                                                                               | 1,045 bcd                                | 2,175 cd | 2,308 de  | 2,373 de    | 2,457 cd    | 2,661 def   | 2,867 def      | 3,279 cd  |
| Field 2 x Tillage A - MP                                                                               | 812ab                                    | 1,494ab  | 1,681ab   | 1,750 bc    | 1,832 b     | 1,882 b     | 2,051ab        | 2,269a    |
| Field 2 x Tillage A - CP                                                                               | 1,160 cd                                 | 1,802 bc | 1,991 bcd | 2,167 cde   | 2,366 cd    | 2,494 de    | 2,764 cde      | 3,103 bc  |
| Field 2 x Tillage A - PH                                                                               | 1,072 bcd                                | 1,831 bc | 2,180 cd  | 2,520 ef    | 2,664 de    | 2,835 efg   | 3,042 def      | 3,396 cd  |
| Field 2 x Tillage A - DH                                                                               | 1,074 bcd                                | 2,385 d  | 2,795 f   | 2,918 f     | 3,014 e     | 3,049 fg    | 3,183 ef       | 3,319 cd  |
| Field 2 x Tillage A - NT                                                                               | 1,285 d                                  | 2,479 d  | 2,740 ef  | 2,869 f     | 3,007 e     | 3,123 g     | 3,243 f        | 3,509 d   |
| Field 1 x Tillage B - MP                                                                               | 760a                                     | 1,449a   | 1,530a    | 1,567a      | 1,555a      | 1,720a      | 2,050a         | 2,634a    |
| Field 1 x Tillage B - CP                                                                               | 734a                                     | 1,463a   | 1,652a    | 1,786ab     | 1,951ab     | 2,168ab     | 2,472abc       | 2,885ab   |
| Field 1 x Tillage B - PH                                                                               | 895abc                                   | 1,849ab  | 2,013ab   | 2,141abcd   | 2,164 bc    | 2,402 bc    | 2,620abc       | 3,025ab   |
| Field 1 x Tillage B - DH                                                                               | 867ab                                    | 1,798ab  | 1,962ab   | 2,082abcd   | 2,203 bcd   | 2,436 bc    | 2,669 bc       | 3,001ab   |
| Field 1 x Tillage B - NT                                                                               | 948abc                                   | 1,912ab  | 2,069ab   | 2,167 bcd   | 2,257 bcde  | 2,347 bc    | 2,590abc       | 2,900ab   |
| Field 2 x Tillage B - MP                                                                               | 1,000abc                                 | 1,753ab  | 1,962ab   | 2,063abc    | 2,105ab     | 2,182ab     | 2,426ab        | 2,864ab   |
| Field 2 x Tillage B - CP                                                                               | 973abc                                   | 1,767ab  | 2,084ab   | 2,282 bcd   | 2,501 bcde  | 2,630 bc    | 2,848 bc       | 3,115ab   |
| Field 2 x Tillage B - PH                                                                               | 1,135 bc                                 | 2,153 b  | 2,446 b   | 2,637 cd    | 2,714 cde   | 2,864 c     | 2,996 bc       | 3,255 b   |
| Field 2 x Tillage B - DH                                                                               | 1,107 bc                                 | 2,102 b  | 2,393 b   | 2,578 cd    | 2,753 de    | 2,898 c     | 3,045 c        | 3,231ab   |
| Field 2 x Tillage B - NT                                                                               | 1,188 c                                  | 2,216 b  | 2,501 b   | 2,663 d     | 2,807 e     | 2,809 c     | 2,966 bc       | 3,130ab   |
| <i>Means - (Tillage A x Tillage B, interaction effects, simple comparisons) - Homogeneous subsets*</i> |                                          |          |           |             |             |             |                |           |
| MP x <MP                                                                                               | 677ab                                    | 1338a    | 1459a     | 1554ab      | 1559ab      | 1659ab      | 1810abc        | 2287abc   |
| MP x <CP                                                                                               | 624a                                     | 1267a    | 1427a     | 1344a       | 1412a       | 1493a       | 1765a          | 2085a     |
| MP x <PH                                                                                               | 702abc                                   | 1405a    | 1436a     | 1475a       | 1552ab      | 1681ab      | 1792ab         | 2108a     |
| MP x <DH                                                                                               | 775abcd                                  | 1435a    | 1549a     | 1549ab      | 1616ab      | 1794abc     | 2065abcde      | 2179ab    |
| MP x <NT                                                                                               | 680ab                                    | 1266a    | 1454a     | 1589abc     | 1645abc     | 1626ab      | 1884abcd       | 2110a     |
| CP x <MP                                                                                               | 1151 bcdef                               | 1556a    | 1627a     | 1739abcd    | 1774abcd    | 1894abc     | 2279abcdef     | 2786abcd  |
| CP x <CP                                                                                               | 991abcdef                                | 1513a    | 1737a     | 1918abcde   | 2062abcde   | 2293 bcdefg | 2590 cdefghij  | 3004 de   |
| CP x <PH                                                                                               | 1129abcdef                               | 1863abc  | 1899a     | 2083abcdef  | 2244 bcdefg | 2418 cdefgh | 2648 cdefghij  | 3109 de   |
| CP x <DH                                                                                               | 1016abcdef                               | 1708ab   | 1758a     | 1906abcde   | 2213abcdef  | 2454 cdefgh | 2802 cdefghij  | 3091 de   |
| CP x <NT                                                                                               | 915abcde                                 | 1608a    | 1853a     | 1951abcde   | 2160abcdef  | 2256 bcdefg | 2561 bcdefghij | 2950 cde  |
| PH x <MP                                                                                               | 916abcde                                 | 1754ab   | 1941a     | 1897abcde   | 1836abcd    | 1961abcd    | 2286abcdefg    | 2868 bcde |
| PH x <CP                                                                                               | 963abcde                                 | 1703ab   | 1909a     | 2114abcdef  | 2342 bcdefg | 2617 defghi | 2837 cdefghij  | 3404 def  |
| PH x <PH                                                                                               | 968abcde                                 | 1584a    | 1905a     | 2358 cdefg  | 2434 cdefgh | 2682 efghi  | 2946 fghij     | 3334 def  |
| PH x <DH                                                                                               | 946abcde                                 | 1624a    | 1988ab    | 2532 defg   | 2678 efgh   | 2889 ghi    | 3137 ij        | 3460 def  |
| PH x <NT                                                                                               | 968abcde                                 | 1732ab   | 2077abc   | 2459 defg   | 2655 efgh   | 2871 fghi   | 3061 fghij     | 3337 def  |
| MP x <MP                                                                                               | 862abcde                                 | 1650a    | 1929a     | 2001abcde   | 2032abcde   | 2168abcdef  | 2471abcdefghi  | 2977 cde  |
| DH x <CP                                                                                               | 704abc                                   | 1715ab   | 2192abcd  | 2473 defg   | 2751 efgh   | 2816 fghi   | 3069 ghij      | 3179 def  |
| DH x <PH                                                                                               | 960abcde                                 | 2545 cd  | 2986 de   | 3039 g      | 2941 fgh    | 3089 hi     | 3191 ij        | 3286 def  |
| DH x <DH                                                                                               | 978abcde                                 | 2441 bcd | 2817 cde  | 2841 fg     | 2926 fgh    | 3094 hi     | 3128 hij       | 3328 def  |
| DH x <NT                                                                                               | 1264 def                                 | 2813 d   | 2970 de   | 2994 g      | 3044 gh     | 2925 ghi    | 3114 hij       | 3248 def  |
| NT x <MP                                                                                               | 796abcde                                 | 1707ab   | 1775a     | 1886abcde   | 1952abcde   | 2072abcde   | 2345abcdefgh   | 2828 bcde |
| NT x <CP                                                                                               | 985abcde                                 | 1879abc  | 2076abc   | 2320 bcdefg | 2562 defgh  | 2775 efghi  | 3040 fghij     | 3328 def  |
| NT x <PH                                                                                               | 1314 ef                                  | 2605 cd  | 2922 de   | 2993 g      | 3027 gh     | 3294 i      | 3465 j         | 3865 f    |
| NT x <DH                                                                                               | 1220 cdef                                | 2541 cd  | 2776 bcde | 2821 fg     | 2959 fgh    | 3104 hi     | 3155 ij        | 3521 ef   |
| NT x <NT                                                                                               | 1513 f                                   | 2902 d   | 3072 e    | 3083 g      | 3158 h      | 3213 i      | 3270 jj        | 3430 def  |

\*based on Tukey test

**Table S4.** Results from the statistical analysis for the 2002 penetration resistance measurements (Tillage A = last tillage, Tillage B = previous tillage).

| Depth                    | Soil penetration resistance (kPa) - 2002                                          |             |             |               |            |              |             |             |
|--------------------------|-----------------------------------------------------------------------------------|-------------|-------------|---------------|------------|--------------|-------------|-------------|
|                          | 0.05 m                                                                            | 0.10 m      | 0.15 m      | 0.20 m        | 0.25 m     | 0.30 m       | 0.35 m      | 0.40 m      |
|                          | <i>F statistic</i>                                                                |             |             |               |            |              |             |             |
| Field                    | 202.725                                                                           | 40.352      | 56.214      | 76.517        | 96.089     | 91.808       | 69.605      | 71.198      |
| Tillage A                | 296.767                                                                           | 76.242      | 117.383     | 128.309       | 155.262    | 103.687      | 69.902      | 45.032      |
| Field x Tillage A        | 2.836                                                                             | 0.875       | 1.614       | 1.788         | 1.023      | 1.054        | 0.924       | 1.177       |
| Tillage B                | 550.529                                                                           | 53.090      | 49.776      | 68.238        | 59.257     | 43.412       | 29.181      | 18.023      |
| Field x Tillage B        | 1.913                                                                             | 0.785       | 1.004       | 1.610         | 0.764      | 1.169        | 0.770       | 0.407       |
| Tillage A x Tillage B    | 32.859                                                                            | 9.037       | 9.231       | 9.291         | 6.815      | 3.806        | 2.592       | 2.526       |
|                          | <i>p-value</i>                                                                    |             |             |               |            |              |             |             |
| Field                    | 0.000                                                                             | 0.000       | 0.000       | 0.000         | 0.000      | 0.000        | 0.000       | 0.000       |
| Tillage A                | 0.000                                                                             | 0.000       | 0.000       | 0.000         | 0.000      | 0.000        | 0.000       | 0.000       |
| Field x Tillage A        | 0.000                                                                             | 0.647       | 0.042       | 0.018         | 0.446      | 0.406        | 0.580       | 0.270       |
| Tillage B                | 0.000                                                                             | 0.000       | 0.000       | 0.000         | 0.000      | 0.000        | 0.000       | 0.000       |
| Field x Tillage B        | 0.009                                                                             | 0.766       | 0.471       | 0.043         | 0.791      | 0.278        | 0.785       | 0.996       |
| Tillage A x Tillage B    | 0.000                                                                             | 0.000       | 0.000       | 0.000         | 0.000      | 0.000        | 0.002       | 0.002       |
|                          | <i>Means (Field, main effects) - Homogeneous subsets*</i>                         |             |             |               |            |              |             |             |
| Field 1                  | 589                                                                               | 1361        | 1691        | 1892          | 1945       | 2019         | 2225        | 2411        |
| Field 2                  | 812                                                                               | 1625        | 2003        | 2224          | 2341       | 2471         | 2671        | 2897        |
|                          | <i>Means (Tillage, main effects) - Homogeneous subsets*</i>                       |             |             |               |            |              |             |             |
| Tillage A - MP           | 452a                                                                              | 1022a       | 1294a       | 1404a         | 1356a      | 1435a        | 1697a       | 2013a       |
| Tillage A - CP           | 549 b                                                                             | 1203a       | 1432a       | 1762 b        | 1859 b     | 2047 b       | 2260 b      | 2416 b      |
| Tillage A - PH           | 555 b                                                                             | 1422 b      | 1781 b      | 2119 c        | 2153 c     | 2299 c       | 2503 c      | 2844 c      |
| Tillage A - DH           | 736 c                                                                             | 1876 c      | 2398 c      | 2580 d        | 2718 d     | 2736 d       | 2948 d      | 3062 c      |
| Tillage A - NT           | 1207 d                                                                            | 1942 c      | 2328 c      | 2422 c        | 2629 d     | 2708 d       | 2831 d      | 2931 c      |
| Tillage B - MP           | 458a                                                                              | 1162a       | 1456a       | 1554a         | 1597a      | 1662a        | 1922a       | 2210a       |
| Tillage B - CP           | 476a                                                                              | 1237a       | 1631ab      | 1881 b        | 2012 b     | 2186 b       | 2352 b      | 2566 b      |
| Tillage B - PH           | 517a                                                                              | 1438 b      | 1811 b      | 2159 c        | 2273 c     | 2416 c       | 2617 c      | 2856 c      |
| Tillage B - DH           | 621 b                                                                             | 1622 c      | 2061 c      | 2223 c        | 2383 c     | 2468 c       | 2647 c      | 2826 c      |
| Tillage B - NT           | 1425 c                                                                            | 2006 d      | 2276 d      | 2469 d        | 2449 c     | 2492 c       | 2700 c      | 2809 bc     |
|                          | <i>Means (Field X Tillage A, interaction effects) - Homogeneous subsets*</i>      |             |             |               |            |              |             |             |
| Field 1 x Tillage A - MP | 339a                                                                              | 891a        | 1138a       | 1238a         | 1158a      | 1209a        | 1474a       | 1770a       |
| Field 1 x Tillage A - CP | 438a                                                                              | 1071a       | 1276ab      | 1596ab        | 1661 b     | 1821 b       | 2037 b      | 2173 b      |
| Field 1 x Tillage A - PH | 444a                                                                              | 1290a       | 1625 b      | 1953 bc       | 1955 b     | 2073 bc      | 2280 bc     | 2601 c      |
| Field 1 x Tillage A - DH | 625a                                                                              | 1744 b      | 2242 c      | 2414 d        | 2520 c     | 2510 d       | 2725 d      | 2819 c      |
| Field 1 x Tillage A - NT | 1,096 b                                                                           | 1810 b      | 2172 c      | 2256 cd       | 2431 c     | 2482 cd      | 2608 cd     | 2688 c      |
| Field 2 x Tillage A - MP | 565a                                                                              | 1154a       | 1450a       | 1570a         | 1554a      | 1661a        | 1920a       | 2256a       |
| Field 2 x Tillage A - CP | 660a                                                                              | 1335a       | 1588ab      | 1928ab        | 2057 b     | 2273 b       | 2483 b      | 2659ab      |
| Field 2 x Tillage A - PH | 666a                                                                              | 1554a       | 1937 b      | 2285 bc       | 2351 b     | 2525 bc      | 2726 bc     | 3087 bc     |
| Field 2 x Tillage A - DH | 847a                                                                              | 2008 b      | 2554 c      | 2746 d        | 2916 c     | 2962 c       | 3171 c      | 3305 c      |
| Field 2 x Tillage A - NT | 1,318 b                                                                           | 2074 b      | 2484 c      | 2588 cd       | 2827 c     | 2934 c       | 3054 c      | 3174 c      |
|                          | <i>Means (Field X Tillage B, interaction effects) - Homogeneous subsets*</i>      |             |             |               |            |              |             |             |
| Field 1 x Tillage B - MP | 347a                                                                              | 1030a       | 1300a       | 1388a         | 1399a      | 1436a        | 1699a       | 1967a       |
| Field 1 x Tillage B - CP | 363a                                                                              | 1105ab      | 1475ab      | 1715ab        | 1814ab     | 1960ab       | 2129ab      | 2323ab      |
| Field 1 x Tillage B - PH | 406a                                                                              | 1306ab      | 1655abc     | 1993 bc       | 2075 b     | 2190 b       | 2394 b      | 2613 b      |
| Field 1 x Tillage B - DH | 510a                                                                              | 1490 bc     | 1905 bc     | 2058 bc       | 2185 b     | 2242 b       | 2424 b      | 2583 b      |
| Field 1 x Tillage B - NT | 1,314 b                                                                           | 1874 c      | 2120 c      | 2303 c        | 2251 b     | 2266 b       | 2477 b      | 2566 b      |
| Field 2 x Tillage B - MP | 569a                                                                              | 1162a       | 1456a       | 1554a         | 1597a      | 1662a        | 1922a       | 2210a       |
| Field 2 x Tillage B - CP | 589a                                                                              | 1237a       | 1631a       | 1881ab        | 2012 b     | 2186 b       | 2352 b      | 2566ab      |
| Field 2 x Tillage B - PH | 628a                                                                              | 1438ab      | 1811ab      | 2159 bc       | 2273 bc    | 2416 b       | 2617 b      | 2856 b      |
| Field 2 x Tillage B - DH | 732a                                                                              | 1622 b      | 2061 bc     | 2223 bc       | 2383 bc    | 2468 b       | 2647 b      | 2826 b      |
| Field 2 x Tillage B - NT | 1,536 b                                                                           | 2006 c      | 2276 c      | 2469 c        | 2449 c     | 2492 b       | 2700 b      | 2809 b      |
|                          | <i>Means - (Tillage A x Tillage B, simple comparisons) - Homogeneous subsets*</i> |             |             |               |            |              |             |             |
| MP x <MP                 | 223a                                                                              | 686a        | 992a        | 996a          | 968a       | 1097a        | 1444a       | 1995ab      |
| MP x <CP                 | 233a                                                                              | 880abc      | 1118abc     | 1502abc       | 1497abcd   | 1601abc      | 1806abcd    | 1992ab      |
| MP x <PH                 | 279a                                                                              | 1187abcdefg | 1462abcdef  | 1710 bcdef    | 1709 bcde  | 1825abcd     | 1969abcde   | 2223abcde   |
| MP x <DH                 | 514a                                                                              | 1536 defgh  | 1928 efghi  | 1930 cdefgh   | 2011 defg  | 1963 bcde    | 2149abcdef  | 2282abcde   |
| MP x <NT                 | 1028 b                                                                            | 1518 defgh  | 1777 cdefgh | 1634 bcde     | 1800 bcdef | 1826abcd     | 2245abcdefg | 2559abcdef  |
| CP x <MP                 | 260a                                                                              | 776ab       | 1080ab      | 1294ab        | 1231abc    | 1315ab       | 1610abc     | 2003ab      |
| CP x <CP                 | 303a                                                                              | 991abcd     | 1177abc     | 1604abcd      | 1790 bcdef | 2051 bcdef   | 2242abcdefg | 2385abcdef  |
| CP x <PH                 | 292a                                                                              | 1334 bcdefg | 1773 cdefgh | 2026 cdefghij | 2064 defgh | 2372 cdefgh  | 2490 defg   | 2848 bcdefg |
| CP x <DH                 | 485a                                                                              | 1673 fghij  | 2256 ghij   | 2249 efghij   | 2422 fghi  | 2595 defghij | 2794 efgh   | 2898 cdefg  |
| CP x <NT                 | 1052 b                                                                            | 1410 cdefg  | 1869 defgh  | 2233 efghij   | 2553 ghij  | 2599 defghij | 2626 defgh  | 2696abcdefg |
| PH x <MP                 | 256a                                                                              | 1076abcde   | 1437abcdef  | 1504abc       | 1502abcd   | 1630abc      | 1853abcd    | 2046abc     |
| PH x <CP                 | 348a                                                                              | 1101abcdef  | 1225abcde   | 1796 bcdefg   | 1956 defg  | 2191 cdefg   | 2362 bcdefg | 2573abcdef  |
| PH x <PH                 | 351a                                                                              | 1219abcdefg | 1510abcdef  | 1958 cdefghi  | 2014 defg  | 2195 cdefg   | 2388 bcdefg | 3039 efg    |
| PH x <DH                 | 430a                                                                              | 1340 bcdefg | 1926 efghi  | 2414 ghij     | 2665 hijj  | 2754 efghij  | 3046 gh     | 3157 fg     |
| PH x <NT                 | 1203 bc                                                                           | 2455 kl     | 2956 j      | 3126 jk       | 3229 j     | 3311 j       | 3435 h      | 3464 g      |
| MP x <MP                 | 512a                                                                              | 1008abcd    | 1247abcde   | 1197ab        | 1209ab     | 1325ab       | 1573ab      | 1905a       |
| DH x <CP                 | 261a                                                                              | 898abc      | 1335abcdef  | 1706 bcde     | 1878 cdef  | 2157 cdef    | 2425 cdefg  | 2545abcdef  |
| DH x <PH                 | 419a                                                                              | 1766 ghijj  | 2210 ghi    | 2567 ijj      | 2723 ijj   | 2692 efghij  | 2903 fgh    | 3228 fg     |
| DH x <DH                 | 507a                                                                              | 2173 ijkl   | 2913 ji     | 3052 jk       | 3292 j     | 3164 hij     | 3386 h      | 3496 g      |
| DH x <NT                 | 1409 cde                                                                          | 2267 jkl    | 2598 ijj    | 2595 ji       | 2812 ijj   | 3001 ghij    | 2949 fgh    | 2955 defg   |
| NT x <MP                 | 1021 b                                                                            | 1566 defghi | 1716 bcdefg | 2030 cdefghij | 1870 cdef  | 1808abcd     | 2007abcde   | 2116abcd    |
| NT x <CP                 | 1584 de                                                                           | 2144 ijkl   | 2307 ghijj  | 2203 defghij  | 2173 efghi | 2234 cdefg   | 2464 defg   | 2587abcdef  |
| NT x <PH                 | 1436 cde                                                                          | 1605 efghij | 1952 fghi   | 2333 fghij    | 2254 efghi | 2412 cdefghi | 2763 efgh   | 2884 cdefg  |
| NT x <DH                 | 1743 e                                                                            | 2656 l      | 2966 j      | 3256 k        | 3199 j     | 3205 ij      | 3364 h      | 3477 g      |
| NT x <NT                 | 1342 bcd                                                                          | 2058 hijjk  | #N/A        | 2522 hijj     | 2751 ijj   | 2803 fghij   | 2903 fgh    | 2981 efg    |

\*based on Tukey test

**Table S5.** Volumetric, average soil water content during the penetration resistance measurements.

|                | Soil water content (% v/v) |       |       |       |
|----------------|----------------------------|-------|-------|-------|
|                | 1997                       | 1999  | 2001  | 2002  |
| Mean (Field 1) |                            |       |       |       |
| 0-0.15 m       | 21.96                      | 28.99 | 18.5  | 23.05 |
| 0.15-0.30 m    | 24.11                      | 29.38 | 21.12 | 25.66 |
| 0.30-0.45 m    | 23.62                      | 29.61 | 21.52 | 24.75 |
| Mean (Field 2) |                            |       |       |       |
| 0-0.15 m       | 20.52                      | 27.31 | 17.74 | 21.71 |
| 0.15-0.30 m    | 22.71                      | 27.9  | 20    | 24.1  |
| 0.30-0.45 m    | 22.12                      | 28.11 | 20.58 | 23.67 |

**Table S6.** Results from the statistical analysis for the 2000 soil dry bulk density measurements.

| Depth                                                                      | Dry bulk density (Mg m <sup>-3</sup> ) - 2000 |              |              |
|----------------------------------------------------------------------------|-----------------------------------------------|--------------|--------------|
|                                                                            | 0 - 0.10 m                                    | 0.10- 0.20 m | 0.20- 0.30 m |
| <i>F statistic</i>                                                         |                                               |              |              |
| Field                                                                      | 0.583                                         | 0.246        | 2.081        |
| Tillage                                                                    | 38.137                                        | 41.706       | 13.709       |
| Field X Tillage                                                            | 0.834                                         | 0.198        | 0.722        |
| <i>p-value</i>                                                             |                                               |              |              |
| Field                                                                      | 0.451                                         | 0.624        | 0.160        |
| Tillage                                                                    | 0.000                                         | 0.000        | 0.000        |
| Field X Tillage                                                            | 0.514                                         | 0.937        | 0.584        |
| <i>Means (Field, main effects)</i>                                         |                                               |              |              |
| Field 1                                                                    | 1.31                                          | 1.43         | 1.51         |
| Field 2                                                                    | 1.33                                          | 1.44         | 1.53         |
| <i>Means (Tillage, main effects) - Homogeneous subsets*</i>                |                                               |              |              |
| Tillage - MP                                                               | 1.13a                                         | 1.29a        | 1.43a        |
| Tillage - CP                                                               | 1.18a                                         | 1.30a        | 1.47a        |
| Tillage - PH                                                               | 1.30 b                                        | 1.42 b       | 1.51ab       |
| Tillage - DH                                                               | 1.42 c                                        | 1.57 c       | 1.56 bc      |
| Tillage - NT                                                               | 1.56 d                                        | 1.58 c       | 1.61 c       |
| <i>Means (Field X Tillage, interaction effects) - Homogeneous subsets*</i> |                                               |              |              |
| Field 1 x MP                                                               | 1.10a                                         | 1.30a        | 1.40a        |
| Field 1 x CP                                                               | 1.15a                                         | 1.28a        | 1.44ab       |
| Field 1 x PH                                                               | 1.29 b                                        | 1.42ab       | 1.51 bc      |
| Field 1 x DH                                                               | 1.42 b                                        | 1.57 b       | 1.55 cd      |
| Field 1 x NT                                                               | 1.59 c                                        | 1.56 b       | 1.62 d       |
| Field 2 x MP                                                               | 1.17a                                         | 1.29a        | 1.46a        |
| Field 2 x CP                                                               | 1.21a                                         | 1.32a        | 1.50ab       |
| Field 2 x PH                                                               | 1.31ab                                        | 1.42 b       | 1.51ab       |
| Field 2 x DH                                                               | 1.43 bc                                       | 1.57 c       | 1.57ab       |
| Field 2 x NT                                                               | 1.53 c                                        | 1.59 c       | 1.61 b       |

\*Based on Tukey test

**Table S7.** Results from the statistical analysis for 2001 and 2002 soil dry bulk density measurements (Tillage A = last tillage, Tillage B = previous tillage).

| Depth                                                                             | Dry bulk density (Mg m <sup>3</sup> ) - 2001 |              |              | Dry bulk density (Mg m <sup>3</sup> ) - 2002 |              |              |
|-----------------------------------------------------------------------------------|----------------------------------------------|--------------|--------------|----------------------------------------------|--------------|--------------|
|                                                                                   | 0 - 0.10 m                                   | 0.10- 0.20 m | 0.20- 0.30 m | 0 - 0.10 m                                   | 0.10- 0.20 m | 0.20- 0.30 m |
| <i>F statistic</i>                                                                |                                              |              |              |                                              |              |              |
| Field                                                                             | 160.226                                      | 350.338      | 184.824      | 184.471                                      | 415.384      | 99.208       |
| Tillage A                                                                         | 41.005                                       | 28.042       | 19.775       | 40.687                                       | 35.109       | 10.821       |
| Field x Tillage A                                                                 | 0.383                                        | 0.911        | 1.781        | 0.703                                        | 1.041        | 0.388        |
| Tillage B                                                                         | 7.436                                        | 9.741        | 10.749       | 9.922                                        | 9.946        | 4.451        |
| Field x Tillage B                                                                 | 1.552                                        | 2.363        | 1.841        | 1.750                                        | 1.734        | 0.566        |
| Tillage A x Tillage B                                                             | 1.317                                        | 0.976        | 1.061        | 0.768                                        | 1.909        | 1.036        |
| <i>p-value</i>                                                                    |                                              |              |              |                                              |              |              |
| Field                                                                             | 0.000                                        | 0.000        | 0.000        | 0.000                                        | 0.000        | 0.000        |
| Tillage A                                                                         | 0.000                                        | 0.000        | 0.000        | 0.000                                        | 0.000        | 0.000        |
| Field x Tillage A                                                                 | 0.998                                        | 0.597        | 0.018        | 0.858                                        | 0.424        | 0.997        |
| Tillage B                                                                         | 0.000                                        | 0.000        | 0.000        | 0.000                                        | 0.000        | 0.002        |
| Field x Tillage B                                                                 | 0.056                                        | 0.001        | 0.013        | 0.021                                        | 0.023        | 0.958        |
| Tillage A x Tillage B                                                             | 0.199                                        | 0.487        | 0.400        | 0.718                                        | 0.026        | 0.425        |
| Means (Field, main effects)                                                       |                                              |              |              |                                              |              |              |
| Field 1                                                                           | 1.17                                         | 1.32         | 1.47         | 1.18                                         | 1.30         | 1.48         |
| Field 2                                                                           | 1.41                                         | 1.63         | 1.64         | 1.42                                         | 1.60         | 1.65         |
| <i>Means (Tillage A, main effects) - Homogeneous subsets*</i>                     |                                              |              |              |                                              |              |              |
| Tillage A - MP                                                                    | 1.13a                                        | 1.35a        | 1.46a        | 1.14a                                        | 1.34a        | 1.48a        |
| Tillage A - CP                                                                    | 1.20ab                                       | 1.40a        | 1.52 b       | 1.22 b                                       | 1.39ab       | 1.52a        |
| Tillage A - PH                                                                    | 1.27 b                                       | 1.50 b       | 1.56 b       | 1.27 b                                       | 1.41 b       | 1.55ab       |
| Tillage A - DH                                                                    | 1.38 c                                       | 1.58 c       | 1.63 c       | 1.38 c                                       | 1.51 c       | 1.63 c       |
| Tillage A - NT                                                                    | 1.47 d                                       | 1.54 bc      | 1.58 bc      | 1.45 c                                       | 1.58 d       | 1.61 bc      |
| <i>Means (Tillage B, main effects) - Homogeneous subsets*</i>                     |                                              |              |              |                                              |              |              |
| Tillage B - MP                                                                    | 1.22a                                        | 1.39a        | 1.48a        | 1.21a                                        | 1.38a        | 1.50a        |
| Tillage B - CP                                                                    | 1.26a                                        | 1.44ab       | 1.54ab       | 1.28ab                                       | 1.41ab       | 1.54ab       |
| Tillage B - PH                                                                    | 1.30ab                                       | 1.51 bc      | 1.56 bc      | 1.28ab                                       | 1.45 bc      | 1.59 b       |
| Tillage B - DH                                                                    | 1.30ab                                       | 1.49 bc      | 1.56 bc      | 1.31 bc                                      | 1.49 c       | 1.56ab       |
| Tillage B - NT                                                                    | 1.37 b                                       | 1.53 c       | 1.61 c       | 1.38 c                                       | 1.50 c       | 1.60 b       |
| <i>Means (Field x Tillage A, interaction effects) - Homogeneous subsets*</i>      |                                              |              |              |                                              |              |              |
| Field 1 x Tillage A - MP                                                          | 1.01a                                        | 1.20a        | 1.37a        | 1.02a                                        | 1.19a        | 1.39a        |
| Field 1 x Tillage A - CP                                                          | 1.08ab                                       | 1.24a        | 1.44ab       | 1.10ab                                       | 1.23a        | 1.43ab       |
| Field 1 x Tillage A - PH                                                          | 1.15 bc                                      | 1.35 b       | 1.48 bc      | 1.15 b                                       | 1.26a        | 1.47 bc      |
| Field 1 x Tillage A - DH                                                          | 1.26 cd                                      | 1.42 b       | 1.54 c       | 1.26 c                                       | 1.36 b       | 1.54 d       |
| Field 1 x Tillage A - NT                                                          | 1.35 d                                       | 1.38 b       | 1.49 bc      | 1.33 c                                       | 1.43 b       | 1.52 cd      |
| Field 2 x Tillage A - MP                                                          | 1.25a                                        | 1.50a        | 1.55a        | 1.26a                                        | 1.49a        | 1.56a        |
| Field 2 x Tillage A - CP                                                          | 1.32ab                                       | 1.55ab       | 1.61ab       | 1.34a                                        | 1.54ab       | 1.60ab       |
| Field 2 x Tillage A - PH                                                          | 1.39 bc                                      | 1.65 bc      | 1.65abc      | 1.39ab                                       | 1.57ab       | 1.64ab       |
| Field 2 x Tillage A - DH                                                          | 1.50 cd                                      | 1.73 c       | 1.71 bc      | 1.50 bc                                      | 1.66 bc      | 1.71 b       |
| Field 2 x Tillage A - NT                                                          | 1.59 d                                       | 1.69 bc      | 1.66 bc      | 1.57 c                                       | 1.73 c       | 1.69ab       |
| <i>Means (Field X Tillage B, interaction effects) - Homogeneous subsets*</i>      |                                              |              |              |                                              |              |              |
| Field 1 x Tillage B - MP                                                          | 1.10a                                        | 1.24a        | 1.40a        | 1.09a                                        | 1.23a        | 1.41a        |
| Field 1 x Tillage B - CP                                                          | 1.14ab                                       | 1.29ab       | 1.45ab       | 1.16ab                                       | 1.26ab       | 1.45ab       |
| Field 1 x Tillage B - PH                                                          | 1.18ab                                       | 1.35 b       | 1.47ab       | 1.16ab                                       | 1.30ab       | 1.50 b       |
| Field 1 x Tillage B - DH                                                          | 1.18ab                                       | 1.34ab       | 1.47ab       | 1.19ab                                       | 1.34ab       | 1.47ab       |
| Field 1 x Tillage B - NT                                                          | 1.25 b                                       | 1.38 b       | 1.53 b       | 1.26 b                                       | 1.35 b       | 1.52 b       |
| Field 2 x Tillage B - MP                                                          | 1.34                                         | 1.54         | 1.57a        | 1.33a                                        | 1.53a        | 1.58a        |
| Field 2 x Tillage B - CP                                                          | 1.38                                         | 1.59         | 1.62ab       | 1.40ab                                       | 1.56a        | 1.63a        |
| Field 2 x Tillage B - PH                                                          | 1.42                                         | 1.66         | 1.65ab       | 1.40ab                                       | 1.60a        | 1.67a        |
| Field 2 x Tillage B - DH                                                          | 1.42                                         | 1.64         | 1.64ab       | 1.43ab                                       | 1.64a        | 1.64a        |
| Field 2 x Tillage B - NT                                                          | 1.49                                         | 1.68         | 1.70 b       | 1.50 b                                       | 1.65a        | 1.69a        |
| <i>Means - (Tillage A x Tillage B, simple comparisons) - Homogeneous subsets*</i> |                                              |              |              |                                              |              |              |
| MP x <MP                                                                          | 1.11a                                        | 1.33         | 1.42a        | 1.10a                                        | 1.34         | 1.38a        |
| MP x <CP                                                                          | 1.14a                                        | 1.36         | 1.47ab       | 1.18abc                                      | 1.34         | 1.44ab       |
| MP x <PH                                                                          | 1.14a                                        | 1.37         | 1.43ab       | 1.15ab                                       | 1.35         | 1.48ab       |
| MP x <DH                                                                          | 1.12a                                        | 1.33         | 1.45ab       | 1.24abcde                                    | 1.35         | 1.62ab       |
| MP x <NT                                                                          | 1.12a                                        | 1.35         | 1.53ab       | 1.38abcde                                    | 1.50         | 1.58ab       |
| CP x <MP                                                                          | 1.18ab                                       | 1.29         | 1.43ab       | 1.12ab                                       | 1.37         | 1.47ab       |
| CP x <CP                                                                          | 1.21abc                                      | 1.41         | 1.53ab       | 1.21abcd                                     | 1.40         | 1.49ab       |
| CP x <PH                                                                          | 1.13a                                        | 1.40         | 1.49ab       | 1.27abcde                                    | 1.34         | 1.50ab       |
| CP x <DH                                                                          | 1.20abc                                      | 1.40         | 1.54ab       | 1.34abcde                                    | 1.45         | 1.61ab       |
| CP x <NT                                                                          | 1.29abcd                                     | 1.48         | 1.63ab       | 1.43 bcde                                    | 1.51         | 1.63ab       |
| PH x <MP                                                                          | 1.16ab                                       | 1.40         | 1.48ab       | 1.15ab                                       | 1.30         | 1.47ab       |
| PH x <CP                                                                          | 1.24abc                                      | 1.48         | 1.52ab       | 1.22abcd                                     | 1.37         | 1.53ab       |
| PH x <PH                                                                          | 1.34abcd                                     | 1.56         | 1.63ab       | 1.25abcde                                    | 1.41         | 1.61ab       |
| PH x <DH                                                                          | 1.30abcd                                     | 1.52         | 1.61ab       | 1.40abcde                                    | 1.56         | 1.68 b       |
| PH x <NT                                                                          | 1.35abcd                                     | 1.54         | 1.59ab       | 1.38abcde                                    | 1.59         | 1.65ab       |
| MP x <MP                                                                          | 1.25abc                                      | 1.46         | 1.57ab       | 1.14ab                                       | 1.30         | 1.47ab       |
| DH x <CP                                                                          | 1.30abcd                                     | 1.50         | 1.62ab       | 1.21abcd                                     | 1.40         | 1.57ab       |
| DH x <PH                                                                          | 1.42abcd                                     | 1.63         | 1.65ab       | 1.31abcde                                    | 1.49         | 1.62ab       |
| DH x <DH                                                                          | 1.41abcd                                     | 1.64         | 1.62ab       | 1.41abcde                                    | 1.62         | 1.57ab       |
| DH x <NT                                                                          | 1.53 cd                                      | 1.65         | 1.68 b       | 1.50 cde                                     | 1.64         | 1.55ab       |
| NT x <MP                                                                          | 1.40abcd                                     | 1.46         | 1.52ab       | 1.18abc                                      | 1.37         | 1.59ab       |
| NT x <CP                                                                          | 1.40abcd                                     | 1.46         | 1.55ab       | 1.27abcde                                    | 1.42         | 1.57ab       |
| NT x <PH                                                                          | 1.49 bcd                                     | 1.57         | 1.61ab       | 1.37abcde                                    | 1.48         | 1.55ab       |
| NT x <DH                                                                          | 1.45abcd                                     | 1.56         | 1.56ab       | 1.51 de                                      | 1.58         | 1.66ab       |
| NT x <NT                                                                          | 1.60 d                                       | 1.63         | 1.64ab       | 1.57 e                                       | 1.66         | 1.64ab       |

\*based on Tuckey test

**Table S8.** Results from the statistical analysis for the preliminary (1997) soil organic matter measurements (prior the tillage establishment)

| Depth                                      | Soil Organic Matter (%) - 1997 |              |              |
|--------------------------------------------|--------------------------------|--------------|--------------|
|                                            | 0 - 0.10 m                     | 0.10- 0.20 m | 0.20- 0.30 m |
| <i>F statistic</i>                         |                                |              |              |
| Field                                      | 15.219                         | 37.379       | 30.219       |
| Tillage plot                               | 0.446                          | 0.480        | 0.648        |
| Field X Tillage plot                       | 0.000                          | 0.001        | 0.001        |
| <i>p-value</i>                             |                                |              |              |
| Field                                      | 0.001                          | 0.000        | 0.000        |
| Tillage plot                               | 0.775                          | 0.750        | 0.632        |
| Field X Tillage plot                       | 0.992                          | 0.986        | 0.918        |
| <i>Means (Field, main effects)</i>         |                                |              |              |
| Field 1                                    | 2.40                           | 2.23         | 2.31         |
| Field 2                                    | 2.14                           | 1.91         | 2.03         |
| <i>Means (Tillage plots, main effects)</i> |                                |              |              |
| Plot - MP                                  | 2.24                           | 2.10         | 2.14         |
| Plot - CP                                  | 2.35                           | 2.07         | 2.23         |
| Plot - PH                                  | 2.26                           | 2.02         | 2.14         |
| Plot - DH                                  | 2.28                           | 2.12         | 2.20         |
| Plot - NT                                  | 2.21                           | 2.04         | 2.13         |

*\*Based on Tuckey test*

**Table S9.** Results from the statistical analysis for 2001 and 2002 soil organic matter measurements (Tillage A = last tillage, Tillage B = previous tillage).

| Depth                    | Soil organic matter (%) - 2001                                                    |              |              | Soil organic matter (%) - 2002 |              |              |
|--------------------------|-----------------------------------------------------------------------------------|--------------|--------------|--------------------------------|--------------|--------------|
|                          | 0 - 0.10 m                                                                        | 0.10- 0.20 m | 0.20- 0.30 m | 0 - 0.10 m                     | 0.10- 0.20 m | 0.20- 0.30 m |
|                          | <i>F statistic</i>                                                                |              |              |                                |              |              |
| Field                    | 46.759                                                                            | 200.988      | 98.572       | 45.226                         | 131.925      | 105.031      |
| Tillage A                | 63.819                                                                            | 43.937       | 17.867       | 46.478                         | 23.519       | 25.708       |
| Field x Tillage A        | 1.485                                                                             | 1.999        | 1.619        | 0.457                          | 1.018        | 0.435        |
| Tillage B                | 38.177                                                                            | 0.548        | 23.218       | 36.280                         | 0.800        | 8.624        |
| Field x Tillage B        | 0.797                                                                             | 1.094        | 1.030        | 1.084                          | 1.312        | 1.294        |
| Tillage A x Tillage B    | 2.765                                                                             | 1.827        | 1.382        | 1.455                          | 2.450        | 0.603        |
|                          | <i>p-value</i>                                                                    |              |              |                                |              |              |
| Field                    | 0.000                                                                             | 0.000        | 0.000        | 0.000                          | 0.000        | 0.000        |
| Tillage A                | 0.000                                                                             | 0.000        | 0.000        | 0.000                          | 0.000        | 0.000        |
| Field x Tillage A        | 0.077                                                                             | 0.006        | 0.041        | 0.991                          | 0.453        | 0.994        |
| Tillage B                | 0.000                                                                             | 0.701        | 0.000        | 0.000                          | 0.000        | 0.000        |
| Field x Tillage B        | 0.751                                                                             | 0.359        | 0.436        | 0.371                          | 0.161        | 0.173        |
| Tillage A x Tillage B    | 0.001                                                                             | 0.036        | 0.163        | 0.130                          | 0.003        | 0.875        |
|                          | <i>Means (Field, main effects) - Homogeneous subsets*</i>                         |              |              |                                |              |              |
| Field 1                  | 2.21                                                                              | 1.74         | 1.95         | 2.23                           | 1.74         | 1.98         |
| Field 2                  | 1.95                                                                              | 1.42         | 1.71         | 1.95                           | 1.44         | 1.70         |
|                          | <i>Means (Tillage A, main effects) - Homogeneous subsets*</i>                     |              |              |                                |              |              |
| Tillage A - MP           | 1.54a                                                                             | 1.85 d       | 1.70a        | 1.58a                          | 1.82 c       | 1.58a        |
| Tillage A - CP           | 2.16 c                                                                            | 1.58 c       | 1.87 b       | 2.06 b                         | 1.61 b       | 1.84 b       |
| Tillage A - PH           | 1.98 b                                                                            | 1.45ab       | 1.72a        | 2.13 b                         | 1.52ab       | 1.88 b       |
| Tillage A - DH           | 2.35 d                                                                            | 1.42a        | 1.89 b       | 2.22 b                         | 1.45a        | 1.89 bc      |
| Tillage A - NT           | 2.37 d                                                                            | 1.55 bc      | 1.96 b       | 2.45 c                         | 1.55ab       | 2.01 c       |
|                          | <i>Means (Tillage B, main effects) - Homogeneous subsets*</i>                     |              |              |                                |              |              |
| Tillage B - MP           | 1.67a                                                                             | 1.56         | 1.61a        | 1.68a                          | 1.58         | 1.75a        |
| Tillage B - CP           | 2.05 b                                                                            | 1.60         | 1.82 b       | 2.09 b                         | 1.62         | 1.85ab       |
| Tillage B - PH           | 2.12 b                                                                            | 1.59         | 1.85 b       | 1.99 b                         | 1.62         | 1.75a        |
| Tillage B - DH           | 2.18 b                                                                            | 1.55         | 1.87 bc      | 2.32 c                         | 1.57         | 1.89 b       |
| Tillage B - NT           | 2.38 c                                                                            | 1.57         | 1.98 c       | 2.37 c                         | 1.57         | 1.96 b       |
|                          | <i>Means (Field X Tillage A, interaction effects) - Homogeneous subsets*</i>      |              |              |                                |              |              |
| Field 1 x Tillage A - MP | 1.67a                                                                             | 2.01 c       | 1.82a        | 1.72a                          | 1.97 c       | 1.73a        |
| Field 1 x Tillage A - CP | 2.29 bc                                                                           | 1.74 b       | 1.99abc      | 2.20 b                         | 1.76 b       | 1.98 b       |
| Field 1 x Tillage A - PH | 2.11 b                                                                            | 1.61ab       | 1.84ab       | 2.27 bc                        | 1.67ab       | 2.02 bc      |
| Field 1 x Tillage A - DH | 2.48 c                                                                            | 1.58a        | 2.01 bc      | 2.36 bc                        | 1.60a        | 2.03 bc      |
| Field 1 x Tillage A - NT | 2.50 c                                                                            | 1.71ab       | 2.08 c       | 2.59 c                         | 1.70ab       | 2.15 c       |
| Field 2 x Tillage A - MP | 1.67a                                                                             | 2.01 c       | 1.82a        | 1.44a                          | 1.67 b       | 1.44a        |
| Field 2 x Tillage A - CP | 2.29 bc                                                                           | 1.74 b       | 1.99abc      | 1.92 b                         | 1.46a        | 1.70 b       |
| Field 2 x Tillage A - PH | 2.11 b                                                                            | 1.61ab       | 1.84ab       | 1.99 bc                        | 1.37a        | 1.74 b       |
| Field 2 x Tillage A - DH | 2.48 c                                                                            | 1.58a        | 2.01 bc      | 2.08 bc                        | 1.30a        | 1.75 b       |
| Field 2 x Tillage A - NT | 2.50 c                                                                            | 1.71ab       | 2.08 c       | 2.31 c                         | 1.40a        | 1.87 b       |
|                          | <i>Means (Field X Tillage B, interaction effects) - Homogeneous subsets*</i>      |              |              |                                |              |              |
| Field 1 x Tillage B - MP | 1.80a                                                                             | 1.72         | 1.74a        | 1.82a                          | 1.73         | 1.89a        |
| Field 1 x Tillage B - CP | 2.18 b                                                                            | 1.76         | 1.94 b       | 2.23 bc                        | 1.77         | 1.99ab       |
| Field 1 x Tillage B - PH | 2.25 b                                                                            | 1.75         | 1.97 b       | 2.13ab                         | 1.77         | 1.90a        |
| Field 1 x Tillage B - DH | 2.31 b                                                                            | 1.71         | 1.99 b       | 2.46 bc                        | 1.72         | 2.03ab       |
| Field 1 x Tillage B - NT | 2.51 b                                                                            | 1.73         | 2.10 b       | 2.51 c                         | 1.72         | 2.10 b       |
| Field 2 x Tillage B - MP | 1.54a                                                                             | 1.40         | 1.49a        | 1.54a                          | 1.43         | 1.61a        |
| Field 2 x Tillage B - CP | 1.92ab                                                                            | 1.44         | 1.70ab       | 1.95 b                         | 1.47         | 1.71a        |
| Field 2 x Tillage B - PH | 1.99 b                                                                            | 1.43         | 1.73 b       | 1.85ab                         | 1.47         | 1.61a        |
| Field 2 x Tillage B - DH | 2.05 b                                                                            | 1.39         | 1.75 b       | 2.18 b                         | 1.42         | 1.74a        |
| Field 2 x Tillage B - NT | 2.25 b                                                                            | 1.41         | 1.85 b       | 2.23 b                         | 1.42         | 1.82a        |
|                          | <i>Means - (Tillage A x Tillage B, simple comparisons) - Homogeneous subsets*</i> |              |              |                                |              |              |
| MP x <MP                 | 1.44a                                                                             | 1.80 bcde    | 1.62abc      | 1.40a                          | 1.68abcd     | 1.54ab       |
| MP x <CP                 | 1.64abc                                                                           | 1.78abcde    | 1.71abc      | 1.62abc                        | 1.53abcd     | 1.58abc      |
| MP x <PH                 | 1.52ab                                                                            | 1.87 de      | 1.70abc      | 1.51ab                         | 1.54abcd     | 1.53a        |
| MP x <DH                 | 1.58ab                                                                            | 1.84 cde     | 1.71abc      | 1.69abcd                       | 1.54abcd     | 1.62abcd     |
| MP x <NT                 | 1.54ab                                                                            | 1.95 e       | 1.74abc      | 1.70abcd                       | 1.62abcd     | 1.66abcd     |
| CP x <MP                 | 1.77abcde                                                                         | 1.53abcde    | 1.65abc      | 1.79abcde                      | 1.78abcd     | 1.79abcde    |
| CP x <CP                 | 2.24 defgh                                                                        | 1.71abcde    | 1.98 bcd     | 2.03 bcdefg                    | 1.81 bcd     | 1.92abcde    |
| CP x <PH                 | 2.18 cdefg                                                                        | 1.53abcde    | 1.86abcd     | 1.87abcdef                     | 1.48abc      | 1.68abcd     |
| CP x <DH                 | 2.21 defgh                                                                        | 1.56abcde    | 1.89 bcd     | 2.27 defgh                     | 1.52abcd     | 1.90abcd     |
| CP x <NT                 | 2.40 fghi                                                                         | 1.59abcde    | 1.99 bcd     | 2.34 efghi                     | 1.50abcd     | 1.92abcde    |
| PH x <MP                 | 1.51a                                                                             | 1.37ab       | 1.44a        | 1.67abc                        | 1.87 cd      | 1.77abcd     |
| PH x <CP                 | 1.75abcd                                                                          | 1.48abcd     | 1.62ab       | 2.18 cdefgh                    | 1.53abcd     | 1.86abcd     |
| PH x <PH                 | 2.16 cdefg                                                                        | 1.50abcde    | 1.83abcd     | 2.09 bcdefg                    | 1.65abcd     | 1.87abcde    |
| PH x <DH                 | 2.09 bcdefg                                                                       | 1.52abcde    | 1.80abcd     | 2.35 efghi                     | 1.42abc      | 1.89abcde    |
| PH x <NT                 | 2.38 fghi                                                                         | 1.40abc      | 1.89 bcd     | 2.38 efghi                     | 1.61abcd     | 2.00 bcde    |
| MP x <MP                 | 1.84abcdef                                                                        | 1.48abcd     | 1.66abc      | 1.73abcd                       | 1.84 bcd     | 1.79abcde    |
| DH x <CP                 | 2.27 defghi                                                                       | 1.52abcde    | 1.90 bcd     | 2.21 cdefgh                    | 1.56abcd     | 1.89abcde    |
| DH x <PH                 | 2.35 efghi                                                                        | 1.42abcd     | 1.89 bcd     | 2.09 bcdefg                    | 1.52abcd     | 1.81abcde    |
| DH x <DH                 | 2.50 ghi                                                                          | 1.38abc      | 1.94 bcd     | 2.52 ghi                       | 1.44abc      | 1.98abcde    |
| DH x <NT                 | 2.77 hi                                                                           | 1.32a        | 2.05 cd      | 2.54 ghi                       | 1.47abc      | 2.01 cde     |
| NT x <MP                 | 1.78abcde                                                                         | 1.62abcde    | 1.70abc      | 1.79abcde                      | 1.95 d       | 1.87abcde    |
| NT x <CP                 | 2.34 efghi                                                                        | 1.50abcde    | 1.92 bcd     | 2.40 fghi                      | 1.59abcd     | 2.00 bcde    |
| NT x <PH                 | 2.38 fghi                                                                         | 1.61abcde    | 2.00 bcd     | 2.38 efghi                     | 1.40ab       | 1.89abcde    |
| NT x <DH                 | 2.54 ghi                                                                          | 1.47abcd     | 2.01 bcd     | 2.77 hi                        | 1.32a        | 2.05 de      |
| NT x <NT                 | 2.83 i                                                                            | 1.57abcde    | 2.20 d       | 2.90 i                         | 1.57abcd     | 2.24 e       |

\*based on Tukey test
